# Supplementary material for: Transparent Gd2O3 : Eu phosphor layer derived from exfoliated layered gadolinium hydroxide nanosheets
Source: Royal Society of Chemistry journal article supplement (doi:10.1039/b922612e), 2010-01-01
Supplement: b922612e.pdf [file b922612e.pdf]

## Supporting Information

### **“Transparent Gd<sub>2</sub>O<sub>3</sub>:Eu phosphor layer derived from exfoliated layered gadolinium hydroxide nanosheets”**

Kyung-Hee Lee, Byung-Il Lee, Ji-Ho You and Song-Ho Byeon\*

*Department of Applied Chemistry, College of Applied Science, Kyung Hee University,  
Gyeonggi-do 446-701, Korea.*

e-mail: [shbyun@khu.ac.kr](mailto:shbyun@khu.ac.kr) (S.-H. B.)

*Chem. Commun.*

## **Synthesis of $Gd_2(OH)_5NO_3 \cdot nH_2O$ (LGdH- $NO_3$ ) and $Gd_{1.90}Eu_{0.10}(OH)_5NO_3 \cdot nH_2O$ (LGdH:Eu)**

$Gd_2(OH)_5NO_3 \cdot nH_2O$  and  $Gd_{1.90}Eu_{0.10}(OH)_5NO_3 \cdot nH_2O$  were synthesized according to the previous report.<sup>1</sup> Typically, stoichiometric amounts of  $Gd_2O_3$  and  $Eu_2O_3$  was dissolved in a small amount of 10 %  $HNO_3$  solution. After clear solution was formed by uniform stirring, aqueous KOH (10 %) solution was dropwise added until the pH of solution was adjusted to  $\sim 6.9$  at room temperature. The resulting colloidal mixture was put into a Teflon-lined stainless steel autoclave and then maintained at 150 – 170 °C for 12 h. After the reaction was completed, the solid product was collected by filtration, washed with deionized water, and dried at 40 °C for a day. The Eu content in the obtained product was determined to be  $0.098 \pm 0.003$  per formula unit by ICP analysis. Such a value was in agreement with the nominal composition,  $Gd_{1.90}Eu_{0.10}(OH)_5NO_3 \cdot H_2O$ .

### **Characterizations**

The powder X-ray diffraction patterns were recorded on a rotating anode installed diffractometer (MacScience Model M18XHF). The  $Cu K\alpha$  radiation used was monochromated by a curved-crystal graphite. Field emission scanning electron microscopy (FE-SEM) was carried out with a Carl Zeiss LEO SUPRA 55 electron microscope operating at 30 kV. Transmission electron microscopy (TEM) and selected area electron diffraction (SAED) observations were made with a JEOL JEM-2100F electron microscope operating at 300 kV. Atomic force microscopy (AFM) was carried out by using Pucostation STD. The photoluminescence spectra were measured at room temperature using FP-6600 spectrophotometer (JASCO) with a Xenon flash lamp.

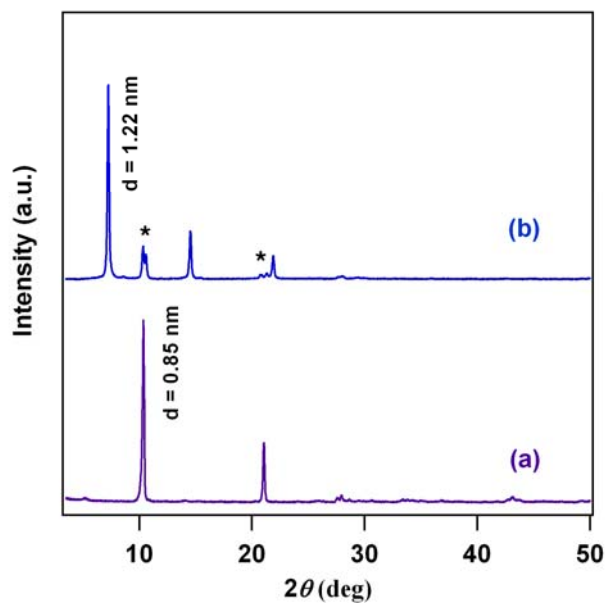

**Fig. S1.** XRD patterns of (a) pristine  $\text{Gd}_2(\text{OH})_5\text{NO}_3 \cdot n\text{H}_2\text{O}$  and (b) formamide intercalated  $\text{Gd}_2(\text{OH})_5\text{NO}_3 \cdot n\text{H}_2\text{O}$ . The diffraction peaks marked by \* correspond to (002) and (004) diffractions of  $\text{Gd}_2(\text{OH})_5\text{NO}_3 \cdot n\text{H}_2\text{O}$  host.

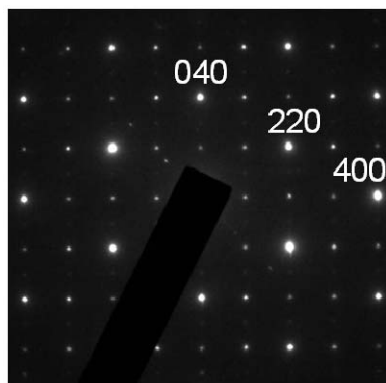

**Fig. S2.** . SAED patterns of  $\text{Gd}_2(\text{OH})_5\text{NO}_3 \cdot n\text{H}_2\text{O}$  before exfoliation.

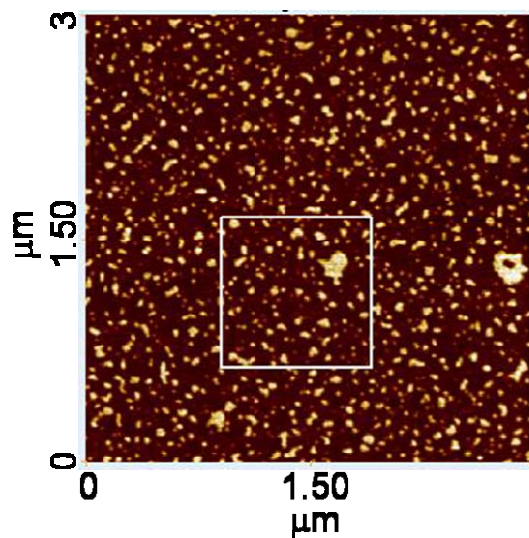

**Fig. S3.** Large scanning area AFM image of LGdH nanosheets deposited on a mica. The area marked by white square line is enlarged in the text.

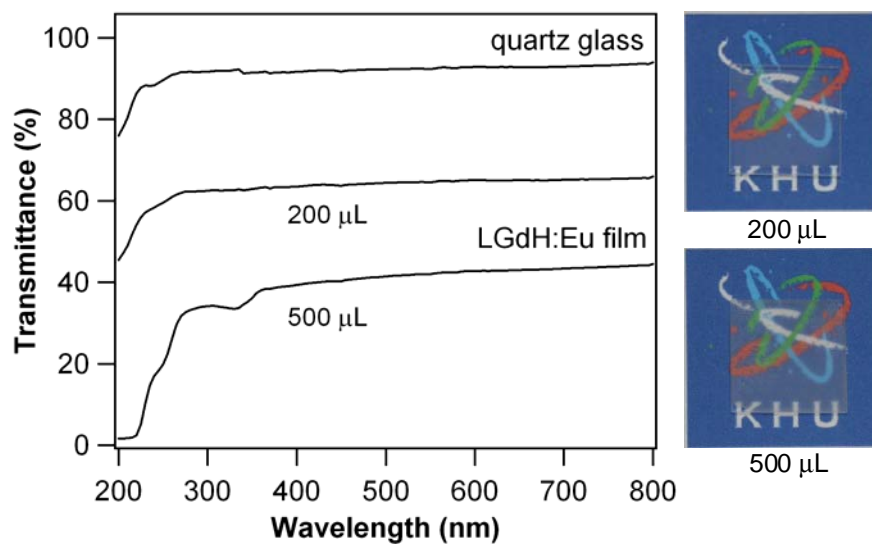

**Fig. S4.** Transmission spectra and photographs under day light of LGdH films deposited on the quartz glass.

#### References for Supporting Information

1. K.-H. Lee and S.-H. Byeon, *Eur. J. Inorg. Chem.*, 2009, 929.
